# Supplementary material
Source: publisher site journal article supplement (https://www.dovepress.com/article/388932)
Supplement: Supplementary file 1 [file get_supplementary_file.php]

**Supplementary material**

**Table S1**. Parameters of molecular docking between compounds and targets.

| Key targets | center_x | center_y | center_z |
| --- | --- | --- | --- |
| PLA2G2A | 59.117 | 28.816 | 46.544 |
| PLA2G10 | -4.129 | 20.948 | -30.971 |
| CLC | 6.727 | -1.524 | 78.764 |
| UCK2 | 30.753 | 23.347 | 2.701 |
| CDA | 22.329 | 53.345 | 55.886 |
| NT5M | 13.654 | 40.75 | 27.566 |

**Notes: PLA2G2A: phospholipase A2 group IIA, PLA2G10: phospholipase A2 group X, CDA: cytidine deaminase, UCK2: uridine-cytidine kinase 2, CLC: charcot-lLeyden crystal galectin, NT5M: 5',3'-Nucleotidase, Mitochondrial.**


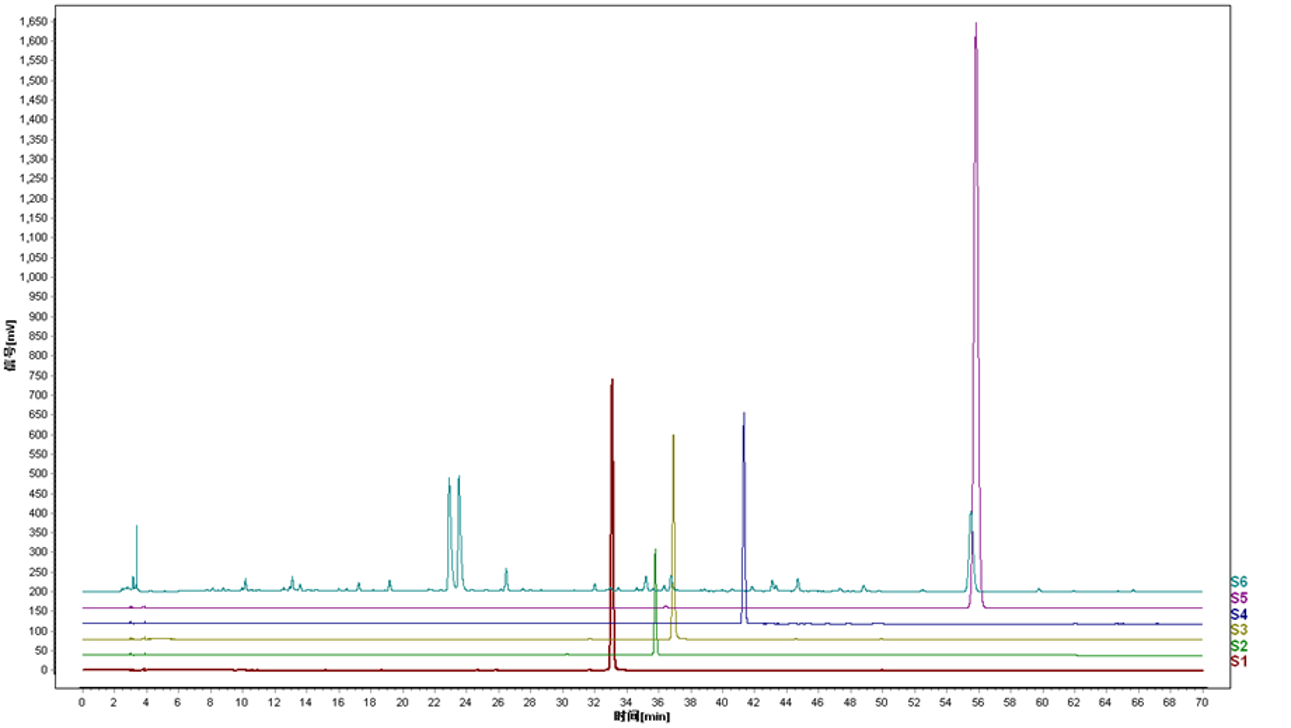


**Figure S1**. Components of RCE using HPLC. S1. Alizarin; S2. 6-hydroxyrubiadin; S3. Purpurin; S4. Rubiadin; S5. Mollugin; S6. RCE. RCE: ethanol extract of *Rubia cordifolia* L..


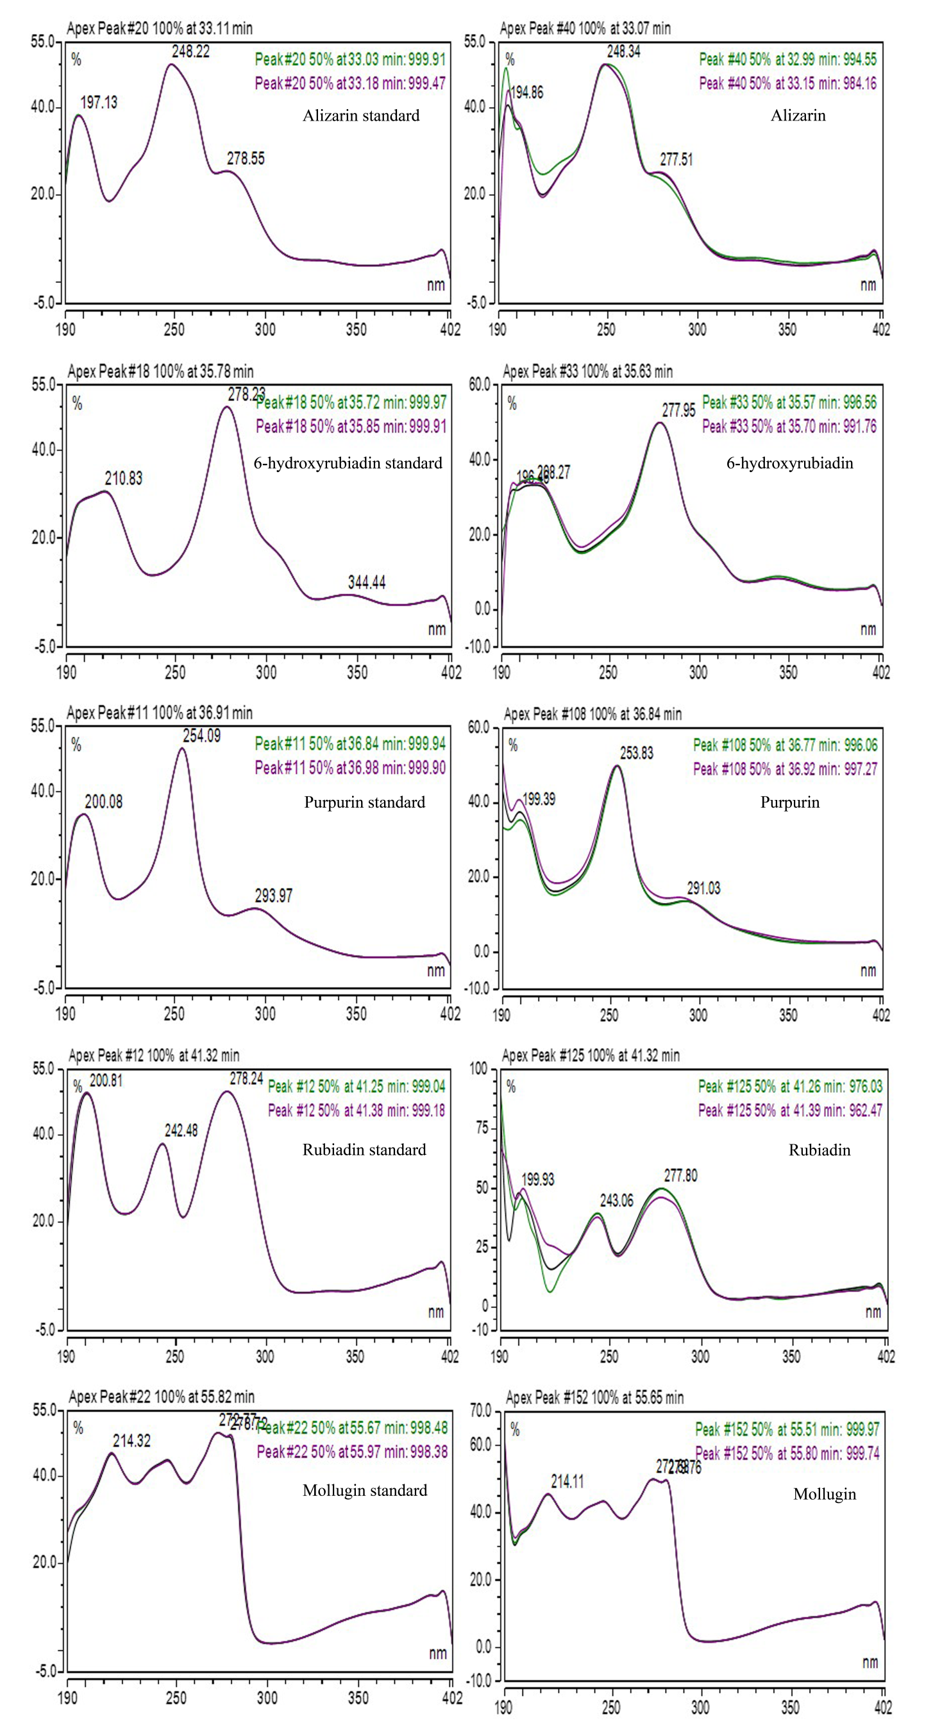


**Figure S2**. The peak purity of alizarin, 6-hydroxyrubiadin, purpurin, rubiadin and mollugin.

Dex

AIA

Control

RCE-High

RCE-Medium

RCE-Low

**Figure S3**. The representative TIC of serum in positive ion mode. RCE: ethanol extract of *Rubia cordifolia* L., Control: control group, AIA: AIA model group, Dex: dexamethasone group, RCE—Low: RCE low-dose group, RCE—medium: RCE medium-dose group, RCE—High: RCE high-dose group.

Dex

AIA

Control

RCE-High

RCE-Medium

RCE-Low

**Figure S4**. The representative TIC of urine in positive ion mode. RCE: ethanol extract of *Rubia cordifolia* L., Control: control group, AIA: AIA model group, Dex: dexamethasone group, RCE—Low: RCE low-dose group, RCE—medium: RCE medium-dose group, RCE—High: RCE high-dose group.

**Figure S5**. The representative TIC of serum QC samples in positive ion mode.

**Figure S6**. The representative TIC of urine QC samples in positive ion mode.

**Table S2.** The binding energy of key targets and compounds.

| Key targets | Potential compounds | ΔG binding (kcal/mol) |
| --- | --- | --- |
| PLA2G2A | Alizarin | -7.53 |
| PLA2G10 | 6-Hydroxyrubiadin | -8.29 |
|  | Nordamnacanthal | -8.02 |
|  | Rubiadin | -7.94 |
|  | Pseudopurpurin | -8.04 |
|  | Purpurin | -7.93 |
|  | Alizarin | -8.22 |
| CLC | Ruberythric acid | -5.58 |
| UCK2 | 6-Hydroxyrubiadin | -6.98 |
|  | Nordamnacanthal | -6.97 |
|  | Rubiadin | -7.14 |
|  | Pseudopurpurin | -6.34 |
|  | Purpurin | -5.96 |
|  | Alizarin | -6.38 |
|  | Ruberythric acid | -5.26 |
|  | Munjistin | -7.19 |
|  | Physcion | -6.44 |
| CDA | 6-Hydroxyrubiadin | -7.4 |
|  | Nordamnacanthal | -7.25 |
|  | Rubiadin | -6.79 |
|  | Pseudopurpurin | -5.35 |
|  | Purpurin | -6.31 |
|  | Ruberythric acid | -5.99 |
|  | Munjistin | -6.04 |
|  | Physcion | -7.1 |
| NT5M | 6-Hydroxyrubiadin | -8.29 |
|  | Nordamnacanthal | -8.02 |
|  | Rubiadin | -7.94 |
|  | Pseudopurpurin | -8.04 |
|  | Purpurin | -7.93 |
|  | Alizarin | -8.22 |

**Notes: PLA2G2A: phospholipase A2 group IIA, PLA2G10: phospholipase A2 group X, CDA: cytidine deaminase, UCK2: uridine-cytidine kinase 2, CLC: charcot-lLeyden crystal galectin, NT5M: 5',3'-Nucleotidase, Mitochondrial.**
